# Supplementary material
Source: PubMed Central journal article supplement (PMC2662182)
Supplement: M804686200_1.pdf [file M804686200_1.pdf]

Supplemental Table 1. Sequences of DNA Oligonucleotides

| <u>Fig.</u>            | <u>Name of Oligonucleotide Used (see bottom of page for sequence)</u>                                                                                                                                                                                       |
|------------------------|-------------------------------------------------------------------------------------------------------------------------------------------------------------------------------------------------------------------------------------------------------------|
| 1B, 1C, 1D, 1E, and 1F | <u>B1S</u> and <u>S460T</u>                                                                                                                                                                                                                                 |
| 2B, 2C, 2D, 2E, and 2F | <u>B1S</u> and <u>S460T</u>                                                                                                                                                                                                                                 |
| 3A                     | 5' biotin and 3' tail: <u>B1S</u> and <u>S460T</u><br>5' tail and 3' biotin: <u>60T1S</u> and <u>S4B</u><br>Fork: <u>60T1S</u> and <u>S460T</u><br>3' tail and no 5' tail: <u>S460T</u> and <u>1S</u><br>5' tail and no 3' tail: <u>60T1S</u> and <u>S4</u> |
| 3C and 3E              | <u>1A</u> , <u>60T1B</u> , and <u>460T</u>                                                                                                                                                                                                                  |
| 3D and 3F              | Tandem duplex with 3' Tail: <u>1A</u> , <u>60T1B</u> , and <u>460T</u><br>Tandem duplex with no 3' Tail: <u>1A</u> , <u>60T1B</u> , and <u>4</u>                                                                                                            |
| 3A, 3B, 3C, 3D, 3F     | <u>B1S</u> and <u>S460T</u>                                                                                                                                                                                                                                 |
| 5A and 5B              | <u>60T</u>                                                                                                                                                                                                                                                  |
| 6B and 6C              | <u>M135PT</u>                                                                                                                                                                                                                                               |
| 6D and 6E              | <u>M135PB</u>                                                                                                                                                                                                                                               |
| <u>Name</u>            | <u>Sequence</u>                                                                                                                                                                                                                                             |
| <u>B1S</u>             | 5'-biotin- GAC GCT GCC GAA TTC TGG CTT GCT AGG ACA T -3'                                                                                                                                                                                                    |
| <u>S460T</u>           | 5'- AT GTC CTA GCA AGC CAG AAT TCG GCA GCG TC TTT TTT<br>TTT TTT TTT<br>TTT TTT TTT TTT -3'                                                                                                                 |
| <u>60T1S</u>           | 5'- TTT TTT<br>TTT TTT TTT TTT TTT TTT TTT GAC GCT GCC GAA TTC TGG<br>CTT GCT AGG ACA T -3'                                                                                                                 |
| <u>S4B</u>             | 5'- AT GTC CTA GCA AGC CAG AAT TCG GCA GCG TC biotin -3'                                                                                                                                                                                                    |
| <u>1S</u>              | 5'- GAC GCT GCC GAA TTC TGG CTT GCT AGG ACA T -3'                                                                                                                                                                                                           |
| <u>S4</u>              | 5'- AT GTC CTA GCA AGC CAG AAT TCG GCA GCG TC -3'                                                                                                                                                                                                           |
| <u>1A</u>              | 5'- GAC GCT GCC GAA TTC TGG CTT GCT A -3'                                                                                                                                                                                                                   |
| <u>60T1B</u>           | 5'- TTT TTT<br>TTT TTT TTT TTT TTT TTT TTT TC ATG TCG TCG TAA TAT<br>GAC GTC GG -3'                                                                                                                         |
| <u>460T</u>            | 5'- CC GAC GTC ATA TTA CGA CGA CAT GAT AGC AAG CCA<br>GAA TTC GGC AGC GTC TTT TTT TTT TTT TTT TTT TTT TTT TTT<br>TTT TTT -3'                                                                                        |
| <u>4</u>               | 5'- CC GAC GTC ATA TTA CGA CGA CAT GAT AGC AAG CCA<br>GAA TTC GGC AGC GTC -3'                                                                                                                                                                               |
| <u>60T</u>             | 5'- TTT TTT<br>TTT TTT TTT TTT TTT TTT TTT -3'                                                                                                                                                              |
| <u>M135PT</u>          | 5' - TTT AAG CCA<br>ACG CTC AAC AGT AGG GCT T - 3'                                                                                                                                                                      |
| <u>M135PB</u>          | 5' - Biotin-AAG CCA ACG CTC AAC AGT AGG GCT T - 3'                                                                                                                                                                                                          |
